# A Comparison of Sex- and Weight-based ProSeal™ Laryngeal Mask Size Selection Criteria

## A Randomized Study of Healthy Anesthetized, Paralyzed Adult Patients

Shinichi Kihara, M.D.,\* Joseph R. Brimacombe, F.R.C.A., M.D.,† Yuichi Yaguchi, M.D.,\* Noriko Taguchi, M.D.,\* Seiji Watanabe, M.D.\*

**Background:** The authors compared the manufacturer's weight-based formula (size 3 for weight < 50 kg, size 4 for weight 50–70 kg, and size 5 for weight > 70 kg) with a sex-based formula (size 4 for women and size 5 for men) for selecting the appropriate size of ProSeal™ laryngeal mask airway.

**Methods:** Two hundred thirty-seven healthy, anesthetized, paralyzed adult patients (American Society of Anesthesiologists physical status I or II; age, 18–80 yr) were randomly allocated for weight- or sex-based size selection. An experienced user inserted the ProSeal™ laryngeal mask airway with the digital technique. The following were compared: ease of insertion, oropharyngeal leak pressure, ease of ventilation, gas exchange, location of gas leak, anatomic position, mucosal injury, and postoperative pharyngolaryngeal problems. Intraoperative and postoperative data collection were unblinded and blinded, respectively.

**Results:** Ease of insertion, anatomic position, gas exchange, mucosal injury, and postoperative pharyngolaryngeal problems were similar between groups. For the sex-based group, larger ProSeal™ laryngeal mask airways were selected more frequently ( $P < 0.0001$ ), oropharyngeal leak pressure ( $P = 0.02$ ) was higher, leak volume ( $P = 0.004$ ) and leak fraction ( $P = 0.007$ ) were lower, and oropharyngeal leaks ( $P = 0.03$ ) were detected less frequently.

**Conclusion:** Size selection for the ProSeal™ laryngeal mask airway is equally effective using the manufacturer's weight-based formula or the sex-based formula in healthy, anesthetized, paralyzed adult patients, but leakage of small volumes of air from the mouth occurs less frequently with the sex-based formula.

THE ProSeal™ laryngeal mask airway (PLMA; Laryngeal Mask Company, Henley-on-Thames, United Kingdom) is a new laryngeal mask device with a modified cuff to improve the seal and a drain tube to provide a channel for regurgitated fluid, prevention of gastric insufflation, and insertion of a gastric tube.<sup>1</sup> The PLMA forms a more effective seal than the LMA-Classic™ (Laryngeal Mask Company, Henley-on-Thames, United Kingdom)<sup>1-7</sup> and isolates the respiratory tract from the gastrointestinal

tract when correctly positioned.<sup>8-11</sup> Size selection is clinically important when using the LMA-Classic™, with larger sizes providing a more effective seal,<sup>12</sup> but differences in design mean that these findings may not apply to the PLMA. The manufacturer recommends that the size of PLMA be based on weight (size 3 for weight < 50 kg, size 4 for weight 50–70 kg, and size 5 for weight > 70 kg), but sex (size 4 for women and size 5 for men) is the most frequently used method of size selection in research and probably clinical practice. In the following randomized study, we compare the manufacturer's weight-based formula with the sex-based formula for selecting the appropriate size of PLMA with respect to ease of insertion, oropharyngeal leak pressure (OLP), ease of ventilation, gas exchange, anatomic position, and postoperative pharyngolaryngeal problems.

## Materials and Methods

We studied 237 patients (American Society of Anesthesiologists physical status I or II; age, 18–80 yr) undergoing peripheral surgery in a noncrossover fashion. Ethical committee approval and written informed consent were obtained from the Mito Saiseikai General Hospital Ethics Committee. Exclusion criteria from the trial were age younger than 18 yr, a known or predicted difficult airway, mouth opening smaller than 2.5 cm, body mass index greater than 35 kg/m<sup>2</sup>, or risk of aspiration. All patients fasted for at least 8 h and were premedicated with 5 mg diazepam and 75 mg roxatidine 1–2 h before induction. Mallampati score,<sup>13</sup> thyromental distance, and sternomental distance were measured at the preanesthetic round. The ventilator and anesthesia circuit (Cicero EM Anesthesia workstation; Draeger Medizintechnik GmbH, Luebeck, Germany) were tested for leaks before each use.

Anesthesia was induced with 2 µg/kg fentanyl and 2.5 mg/kg propofol and maintained with 2–3% sevoflurane in 30% O<sub>2</sub> and air. Neuromuscular blockade was achieved with 0.1 mg/kg vecuronium and maintained with 0.05-mg/kg boluses to keep the train-of-four count less than 1. The patients were randomly allocated for size selection by sex- or weight-based formula. The sex-based formula was size 4 for women and size 5 for men. The weight-based formula was size 3 for weight less than 50 kg, size 4 for weight 50–70 kg, and size 5 for weight greater than 70 kg. Randomization was achieved with

\* Staff Anesthetist, Department of Anaesthesia, Pain Clinic, and Clinical Toxicology, Mito Saiseikai General Hospital. Dr. Kihara's current position: Assistant Professor, Department of Anesthesia, University of Tsukuba, Tsukuba City, Ibaraki, Japan. † Professor, James Cook University, Cairns Base Hospital.

Received from the Department of Anaesthesia, Pain Clinic, and Clinical Toxicology, Mito Saiseikai General Hospital, Mito, Ibaraki, Japan, and James Cook University, Cairns Base Hospital, The Esplanade, Cairns, Australia. Submitted for publication March 5, 2003. Accepted for publication May 21, 2003. Support was received solely from institutional and/or departmental resources. Dr. Brimacombe has worked as a consultant for the Laryngeal Mask Company, Henley-on-Thames, United Kingdom.

Address reprint requests to Dr. Brimacombe: Department of Anaesthesia and Intensive Care, Cairns Base Hospital, The Esplanade, Cairns 4870, Australia. Address electronic mail to: jbrimaco@bigpond.net.au. Individual article reprints may be purchased through the Journal Web site, www.anesthesiology.org.

computer-generated numbers. All insertions were performed by a single experienced PLMA user (S. K., > 200 uses) using the digital insertion technique according to the manufacturer's instructions.<sup>14</sup> The introducer tool was not used. The cuff was inflated with air to an intracuff pressure of 60 cm H<sub>2</sub>O. The insertion time (from picking up the device to capnographic confirmation) and the number of insertion attempts (a failed attempt was defined as removal of the device from the oral cavity) were recorded. A maximum of three attempts was permitted before insertion was considered a failure.

Patients were ventilated for 15 min at the following settings: tidal volume, 10 ml/kg; respiratory rate, 10 breaths/min; inspiratory:expiratory ratio, 1:1. Measurements were made before surgery started with the patient in the supine position and the head resting on a 7-cm-thick pillow. Tidal volume was measured by means of a constant-temperature, hot-wire anemometer that was calibrated before each use. Airway pressure was measured using a piezoresistive semiconductor pressure transducer. Carbon dioxide and sevoflurane were sampled from the proximal end of the PLMA airway tube and measured by means of an infrared multigas analyzer. The following data were measured and recorded by the PM 8060 anesthesia monitor on the Cicero EM every 30 s for the last 5 min, and the following average readings were taken: peak airway pressure, inspired tidal volume, expired tidal volume, pulmonary compliance, oxygen saturation, end-tidal carbon dioxide, and heart rate. Leak volume was calculated by subtracting expired from inspired tidal volume. Leak fraction was calculated by dividing leak volume by inspired tidal volume. Epigastric auscultation was performed to detect air entering the stomach.<sup>15</sup> Oropharyngeal leaks were detected by listening over the mouth with an ear.<sup>16</sup> Drain tube leaks were detected by placing a clear lubricant in the proximal 1 cm of the drain tube and noting whether bubbling occurred during ventilation.<sup>2</sup> Failed oxygenation and ventilation were defined as an inability to maintain oxygen saturation at 95% or greater at an inspired oxygen concentration of 30% and an inability to maintain end-tidal carbon dioxide at 45 mmHg or less, respectively.

When these measurements were complete, OLP and fiberoptic position were determined. OLP was measured by closing the expiratory valve of the circle system at a fixed gas flow of 3 l/min and noting the airway pressure (maximum allowed, 40 cm H<sub>2</sub>O) at which equilibrium was reached. The location (mouth, stomach, or drain tube) of any gas leak at OLP was determined using the same methods as during positive-pressure ventilation. The anatomic position of the airway tube was determined by passing a fiberoptic scope to a position just proximal to the end of the airway tube and scoring the view.<sup>17</sup> The anatomic position of the drain tube was determined by passing a fiberoptic scope to the end of the drain tube. The view was cataloged as mucosa (mu-

cosa blocking the end of the drain tube), open upper esophageal sphincter (a clear view down the esophagus), or glottis (any glottic structure visible). After the ventilatory data collection and seal pressure examination, a well-lubricated 16-French gastric tube was inserted down the drain tube. An unblinded observer collected data during insertion, positive-pressure ventilation, and OLP testing. After removal, the PLMA was inspected for visible blood. Mucosa injury was defined as the detection of visible blood. Patients were questioned about the presence/absence of sore throat and hoarseness 18–24 h postoperatively by an investigator blinded to the size selection formula.

The primary variables tested were ease of insertion, OLP, ease of ventilation, gas exchange, anatomic position, and postoperative pharyngolaryngeal problems reported. Secondary variables tested were location of gas leak and mucosal injury. The sample size of 112 subjects/group was selected to detect a projected difference of 15% or less between the groups for all the primary variables for a type I error of 0.05 and a power of 0.8. The sample size was based on data from previous studies on the PLMA<sup>2,4,5</sup> and a pilot study. Parametric data were tested by means of a paired *t* test. Nonparametric data were tested by means of a chi-square test. Significance was taken as  $P < 0.05$ .

## Results

Patient characteristics are presented in table 1. Two hundred thirty-seven patients were enrolled before both groups had at least 112 patients. There were no differences in patient characteristics between groups. Data about the size of the PLMA, ease of insertion, positive-pressure ventilation, OLP testing, anatomic position, and airway morbidity are presented in table 2. Ease of insertion, anatomic position, gas exchange, mucosal injury, and postoperative pharyngolaryngeal problems were similar between groups. For the sex-based group, larger PLMA sizes were selected more frequently ( $P < 0.0001$ ), OLP ( $P = 0.02$ ) was higher, leak volume ( $P = 0.004$ ) and leak fraction ( $P = 0.007$ ) were lower, and oropharyngeal leaks ( $P = 0.03$ ) were detected less frequently. There were no episodes of failed ventilation or gastric insufflation. Gastric tube insertion was successful in all patients.

## Discussion

The sex-based formula resulted in fewer oropharyngeal leaks than the weight-based formula. This was probably related to the more frequent use of larger sizes because these provide a more effective seal.<sup>18–22</sup> Our findings are similar to those in the studies of Voyagis *et al.*<sup>23</sup> and Berry *et al.*<sup>19</sup> using the *LMA-Classic™* that compared the sex-based formula (size 4 for women and size 5 for men) with an early version of the manufactur-

**Table 1. Demographic Data**

|                               | Sex Based (n = 125) |             |             | Weight Based (n = 112) |             |             |
|-------------------------------|---------------------|-------------|-------------|------------------------|-------------|-------------|
|                               | Male                | Female      | Total       | Male                   | Female      | Total       |
| No.                           | 58                  | 67          | 125         | 52                     | 60          | 112         |
| Age, yr                       | 51.1 ± 16.6         | 48.9 ± 16.5 | 49.9 ± 16.5 | 50.1 ± 16.4            | 51.4 ± 15.6 | 50.8 ± 15.9 |
| Height, cm                    | 167.4 ± 6.7         | 154.6 ± 7.0 | 160.5 ± 9.4 | 167.4 ± 6.6            | 153.9 ± 7.3 | 160.2 ± 9.7 |
| Weight, kg                    | 66.1 ± 10.3         | 54.7 ± 10.1 | 60.0 ± 11.6 | 66.9 ± 10.3            | 55.4 ± 9.8  | 60.8 ± 11.6 |
| ASA PS, No. (1/2)             | 42/16               | 51/16       | 93/32       | 38/14                  | 44/16       | 82/30       |
| Mallampati score, No. (1/2/3) | 46/12/0             | 46/21/0     | 92/33/0     | 42/10/0                | 43/17/0     | 85/27/0     |
| Interincisor distance, mm     | 46.7 ± 7.2          | 42.3 ± 6.0  | 44.3 ± 6.9  | 46.6 ± 7.2             | 42.7 ± 5.1  | 44.5 ± 6.9  |
| Thyromental distance, cm      | 8.0 ± 1.0           | 8.1 ± 1.0   | 8.1 ± 1.0   | 8.1 ± 1.0              | 8.2 ± 1.0   | 8.2 ± 1.0   |
| Sternomental distance, cm     | 13.4 ± 2.0          | 12.3 ± 2.5  | 12.8 ± 2.5  | 13.4 ± 2.1             | 12.3 ± 2.9  | 12.8 ± 2.6  |

Data are mean ± SD or number of patients. All: no significant difference between formulas.

ASA PS = American Society of Anesthesiologists physical status.

er's weight-based formula (size 3 for weight 30–70 kg, size 4 for weight > 70–90 kg, and size 5 for weight > 90 kg).<sup>23</sup> Interestingly, Berry *et al.*<sup>19</sup> and Asai *et al.*<sup>20</sup> found that the sex-based formula also provided a better seal than a smaller size sex-based formula (size 3 for women and size 4 for men). However, we found no difference in gas exchange, suggesting that the improved seal was clinically unimportant.

Airway morbidity and insertion success were similar despite larger sizes being chosen more frequently with the sex-based formula. Asai *et al.*<sup>20</sup> found that calculated mucosal pressures were lower for the sex-based strategy

than the small-size sex-based strategy with the *LMA-Classic™*. In contrast, Grady *et al.*<sup>24</sup> found that the large-size sex-based strategy was inferior to the small-size sex-based strategy in terms of airway morbidity and ease of insertion. Most studies report that insertion success rates are similar for larger and smaller sizes.<sup>19–22,24,25</sup>

Our study has a number of limitations. First, an experienced user conducted all insertions, and our results may not be applicable to inexperienced personnel. Second, all insertions were using the digital technique, and our results may not be applicable to the introducer tool or bougie-guided techniques.<sup>26</sup> Third, we studied

**Table 2. Comparison of Sex- and Weight-based Size Selection Formulas of ProSeal™ Laryngeal Mask Airway**

|                                           | Sex Based   | Weight Based | P Value  |
|-------------------------------------------|-------------|--------------|----------|
| No.                                       | 125         | 112          | NS       |
| PLMA size inserted, No. (3/4/5)           | 0/67/58     | 20/69/23     | < 0.0001 |
| Ease of insertion                         |             |              |          |
| PLMA insertion attempts, No. (1/2/3)      | 118/5/2     | 101/10/1     | NS       |
| Duration for insertion, s                 | 12.8 ± 5.8  | 12.7 ± 6.6   | NS       |
| Positive-pressure ventilation             |             |              |          |
| Peak airway pressure, cm H <sub>2</sub> O | 15.3 ± 3.8  | 15.2 ± 3.9   | NS       |
| Leak volume, ml                           | 13.1 ± 13.4 | 25.3 ± 45.2  | 0.004    |
| Leak fraction, %                          | 2.3 ± 2.4   | 4.6 ± 8.9    | 0.007    |
| Pulmonary compliance                      | 53.6 ± 11.7 | 53.5 ± 13.0  | NS       |
| SpO <sub>2</sub> , %                      | 99.7 ± 0.8  | 99.6 ± 0.9   | NS       |
| ETCO <sub>2</sub> , mmHg                  | 32.0 ± 3.6  | 32.5 ± 3.8   | NS       |
| Leak detectable, No. (y/n)                |             |              |          |
| Stomach                                   | 0/125       | 0/112        | NS       |
| Drain tube                                | 1/124       | 2/110        | NS       |
| Mouth                                     | 3/122       | 11/101       | 0.03     |
| Oropharyngeal leak pressure testing       |             |              |          |
| Leak pressure, cm H <sub>2</sub> O        | 27.2 ± 6.7  | 25.0 ± 9.2   | 0.02     |
| Leak location, No. (stomach/DT/mouth)*    | 0/6/112     | 0/6/97       | NS       |
| Anatomic position                         |             |              |          |
| FOS <i>via</i> airway, No. (1/2/3/4)†     | 5/38/28/54  | 2/33/27/50   | NS       |
| FOS <i>via</i> DT, No. (M/E/G)            | 121/4/0     | 111/1/0      | NS       |
| Airway morbidity                          |             |              |          |
| Mucosal injury, No. (y/n)                 | 7/118       | 6/106        | NS       |
| Sore throat, No. (y/n)                    | 22/103      | 21/91        | NS       |
| Hoarseness, No. (y/n)                     | 7/118       | 5/107        | NS       |

Data are mean ± SD or number of patients.

\* No leaks were observed in seven patients in the sex-based group and nine patients in the weight-based group at 40 cm H<sub>2</sub>O of airway pressure. † FOS score: 4 = only vocal cords visible, 3 = vocal cords plus posterior epiglottis, 2 = vocal cords plus anterior epiglottis, 1 = vocal cords not seen.

DT = drain tube; E = open upper esophageal sphincter; ETCO<sub>2</sub> = end-tidal carbon dioxide; FOS = fiberoptic scope; G = glottic structures visible; M = mucosa blocking the end of the drain tube; NS = not significant; PLMA = ProSeal™ laryngeal mask airway; SpO<sub>2</sub> = oxygen saturation measured by pulse oximetry.

healthy patients with normal lungs. In situations in which higher peak airway pressures would be required such as intraabdominal/intrathoracic surgery, in obese patients, or in patients with restrictive lung disease, it is possible that the sex-based formula would be superior because of the better seal. Fourth, the intraoperative data were collected by an unblinded observer, a potential source of bias.

We conclude that size selection for the PLMA is equally effective using the manufacturer's weight-based formula or the sex-based formula in healthy, anesthetized, paralyzed adult patients, but leakage of small volumes of air from the mouth occurs less frequently with the sex-based formula.

## References

1. Brain AJJ, Verghese C, Strube PJ: The LMA 'ProSeal': A laryngeal mask with an oesophageal vent. *Br J Anaesth* 2000; 84:650-4
2. Brimacombe J, Keller C: The ProSeal laryngeal mask airway: A randomized, crossover study with the standard laryngeal mask airway in paralyzed, anesthetized patients. *ANESTHESIOLOGY* 2000; 93:104-9
3. Keller C, Brimacombe J: Mucosal pressure and oropharyngeal leak pressure with the ProSeal versus the classic laryngeal mask airway. *Br J Anaesth* 2000; 85:262-6
4. Brimacombe J, Keller C, Boehler M, Puehringer F: Positive pressure ventilation with the ProSeal versus Classic laryngeal mask airway: A randomized, crossover study of healthy female patients. *Anesth Analg* 2001; 93:1351-3
5. Brimacombe J, Keller C, Fullekrug B, Agro F, Rosenblatt W, Dierdorf SF, Garcia de Lucas E, Capdevila X, Brimacombe N: A multicenter study comparing the ProSeal with the Classic laryngeal mask airway in anesthetized, nonparalyzed patients. *ANESTHESIOLOGY* 2002; 96:289-95
6. Evans NR, Gardner SV, James MF, King JA, Roux P, Bennett P, Natrass R, Llewellyn R, Visu D: The ProSeal laryngeal mask: Results of a descriptive trial with experience of 300 cases. *Br J Anaesth* 2002; 88:534-9
7. Cook TM, Nolan JP, Verghese C, Strube PJ, Lees M, Millar JM, Baskett PJ: Randomized crossover comparison of the ProSeal with the Classic laryngeal mask airway in unparalysed anesthetized patients. *Br J Anaesth* 2002; 88:527-33
8. Keller C, Brimacombe J, Kleinsasser A, Loeckinger A: Does the ProSeal laryngeal mask airway prevent aspiration of regurgitated fluid? *Anesth Analg* 2000; 91:1017-20
9. Brimacombe J, Keller C: Airway protection with the ProSeal laryngeal mask airway: A case report. *Anaesth Intensive Care* 2001; 29:288-91
10. Evans NR, Gardner SV, James MF: ProSeal laryngeal mask protects against aspiration of fluid in the pharynx. *Br J Anaesth* 2002; 88:584-7
11. De Silva KK, Young P: Protection against aspiration with the ProSeal laryngeal mask airway (letter). *Anaesth Intensive Care* 2002; 30:391
12. Asai T, Brimacombe J: Cuff volume and size selection with the laryngeal mask airway. *Anaesthesia* 2000; 55:1179-84
13. Samsom GLT, Young JRB: Difficult tracheal intubation: A retrospective study. *Anaesthesia* 1987; 42:487-90
14. *LMA ProSeal™ Instruction Manual*. San Diego, LMA North America, 2000
15. Brimacombe J, Keller C, Kurian S, Myles J: Reliability of epigastric auscultation to detect gastric insufflation. *Br J Anaesth* 2002; 88:127-9
16. Keller C, Brimacombe J, Keller K, Morris R: A comparison of four methods for assessing airway sealing pressure with the laryngeal mask airway in adult patients. *Br J Anaesth* 1999; 82:286-7
17. Keller C, Brimacombe J, Puehringer F: A fiberoptic scoring system to assess the position of laryngeal mask airway devices: Interobserver variability and a comparison between the standard, flexible and intubating laryngeal mask airways. *Anaesthesiol Intensivmed Notfallmed Schmerzther* 2000; 35:692-4
18. Van Damme E: [The size 5 laryngeal mask: Initial experiences (letter)]. *Anaesthesiol Intensivmed Notfallmed Schmerzther* 1994; 29:293
19. Berry AM, Brimacombe J, McManus KF, Goldblatt M: An evaluation of the factors influencing selection of the optimal size of laryngeal mask airway in normal adults. *Anaesthesia* 1998; 53:565-70
20. Asai T, Howell TK, Koga K, Morris S: Appropriate size and inflation of the laryngeal mask airway. *Br J Anaesth* 1998; 80:470-4
21. Brimacombe J, Keller C: Laryngeal mask airway size selection in males and females: Ease of insertion, oropharyngeal leak pressure, pharyngeal mucosal pressures and anatomical position. *Br J Anaesth* 1999; 82:703-7
22. Kihara S, Yaguchi Y, Brimacombe J, Watanabe S, Taguchi N, Hosoya N: Intubating laryngeal mask airway size selection: A randomized triple crossover study in paralyzed, anesthetized male and female adult patients. *Anesth Analg* 2002; 94:1023-7
23. Voyagis GS, Batziouulis PG, Secha-Doussaitou PN: Selection of the proper size of laryngeal mask airway in adults. *Anesth Analg* 1996; 83:663-4
24. Grady DM, McHardy F, Wong J, Jin F, Tong D, Chung F: Pharyngolaryngeal morbidity with the laryngeal mask airway in spontaneously breathing patients: Does size matter? *ANESTHESIOLOGY* 2001; 94:760-6
25. Asai T, Murao K, Yukawa H, Shingu K: Re-evaluation of appropriate size of the laryngeal mask airway. *Br J Anaesth* 1999; 83:478-9
26. Howarth A, Brimacombe J, Keller C: Gum elastic bougie-guided insertion of the ProSeal laryngeal mask airway: A new technique. *Anaesth Intensive Care* 2002; 30:624-7
